# Supplementary material for: Research on the elimination of low-concentration formaldehyde by Ag loaded onto Mn/CeO2 catalyst at room temperature
Source: Royal Society of Chemistry journal article supplement (doi:10.1039/d3cp01612a), 2023-01-01
Supplement: d3cp01612a1.pdf [file d3cp01612a1.pdf]

## *Supplementary Information*

### **Research on the elimination of low-concentration formaldehyde by Ag loaded onto Mn/CeO<sub>2</sub> catalyst at room temperature**

Chaomin Duan,<sup>#b</sup> Yanlin Zhou,<sup>#b</sup> Mianwu Meng,<sup>\*ab</sup> Huang Huang,<sup>\*c</sup> Hua Ding,<sup>b</sup> Qi Zhang,<sup>b</sup>

Renyuan Huang<sup>b</sup> and Mengjuan Yan<sup>b</sup>

<sup>a</sup> *Key Laboratory of Ecology of Rare and Endangered Species and Environmental Protection,  
Ministry of Education, Guilin 541004, China*

<sup>b</sup> *College of Environment and Resources, Guangxi Normal University, Guilin 541004, China*

<sup>c</sup> *Guilin Huayue Entech Limited Company, Guilin 541805, China*

---

\* Corresponding authors.

E-mail addresses: [897405894@qq.com](mailto:897405894@qq.com) (M. Meng), [45703155@qq.com](mailto:45703155@qq.com) (H. Huang).

# These authors contributed equally to this work.

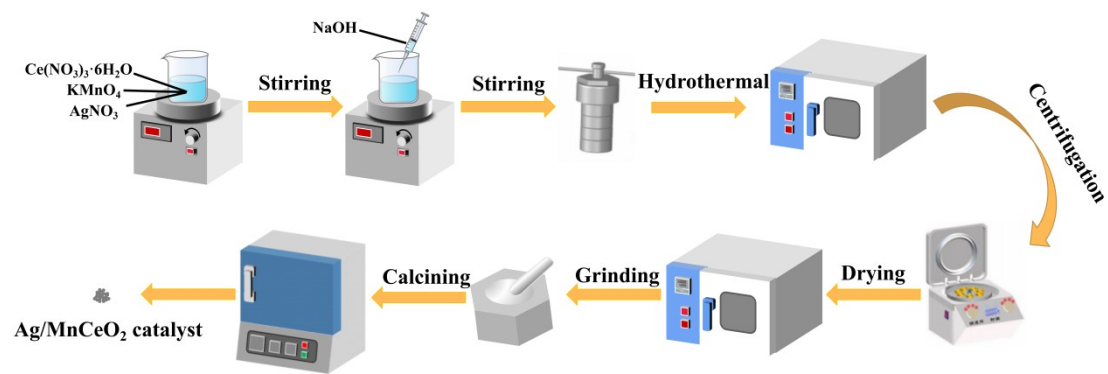

**Fig. S1** The preparation process for catalysts.

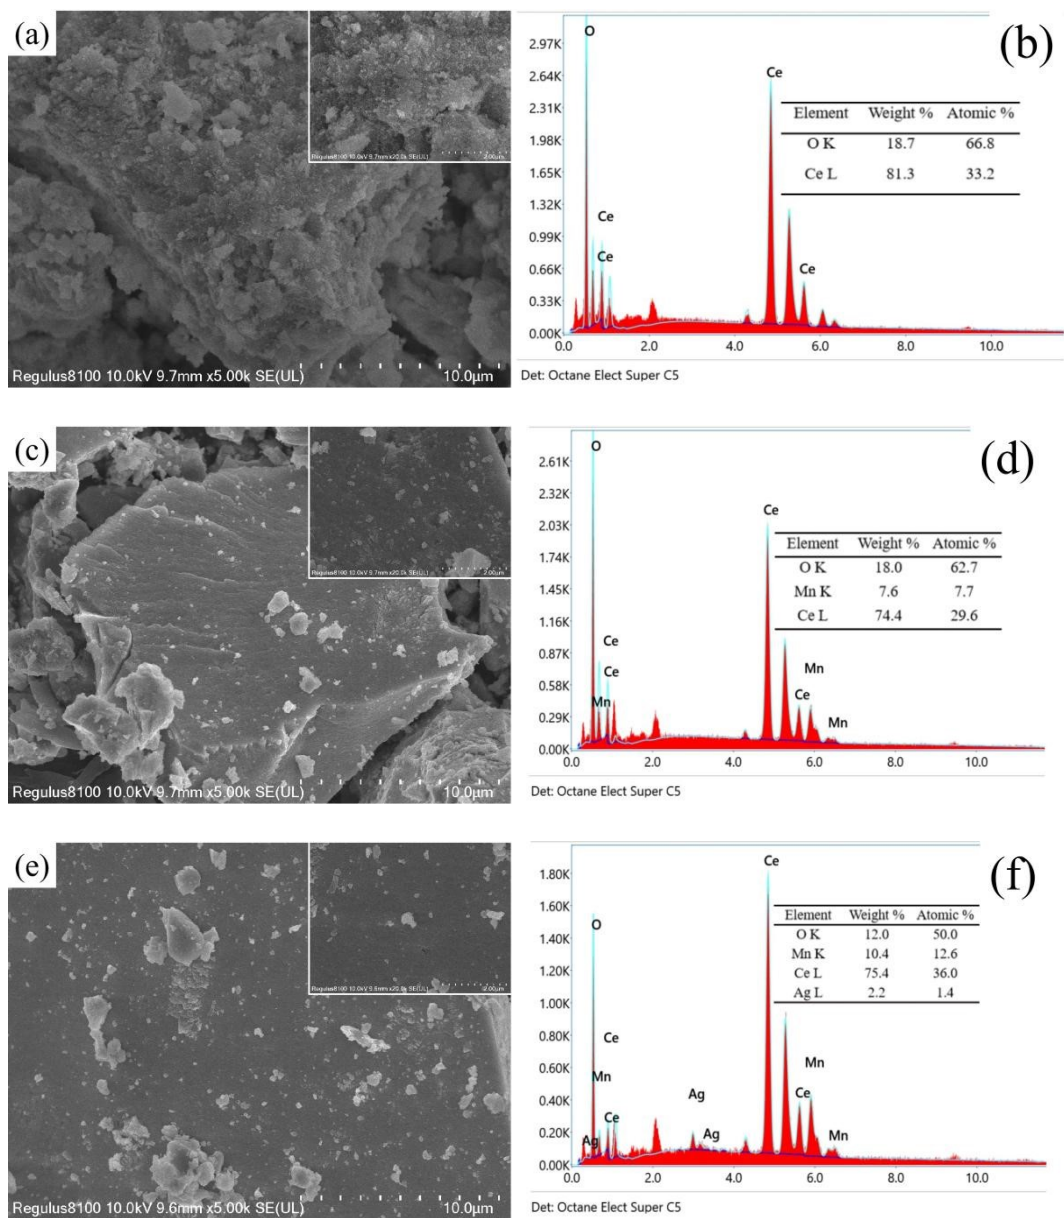

**Fig. S2** SEM and EDS images of pure  $\text{CeO}_2$  (a and b),  $\text{Mn/CeO}_2$  (c and d), and  $\text{Ag/Mn/CeO}_2$  (e and f).

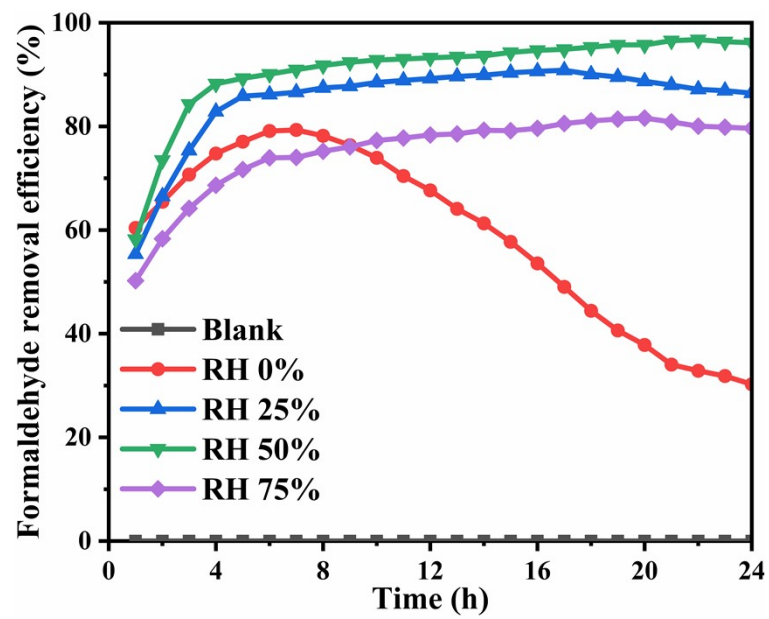

Fig. S3 Formaldehyde removal performance of the Ag/Mn/CeO<sub>2</sub> catalyst at different humidity.
